# Supplementary material for: Characterization of Human-Induced Neural Stem Cells and Derivatives following Transplantation into the Central Nervous System of a Nonhuman Primate and Rats
Source: Hindawi journal article supplement (doi:10.1155/2022/1396735), 2022-12-28
Supplement: f1 [file 1396735.f1.pdf]

## Supplementary Information

(a)

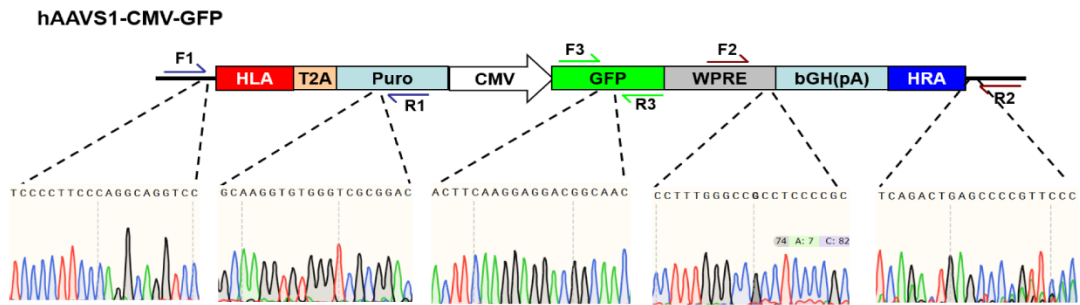

(b)

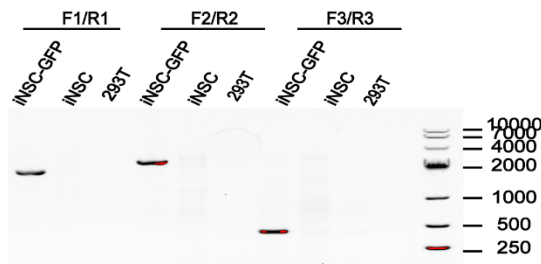

(c)

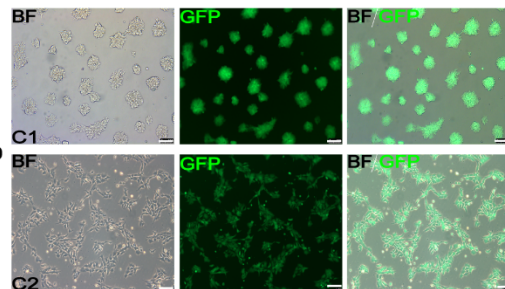

(d)

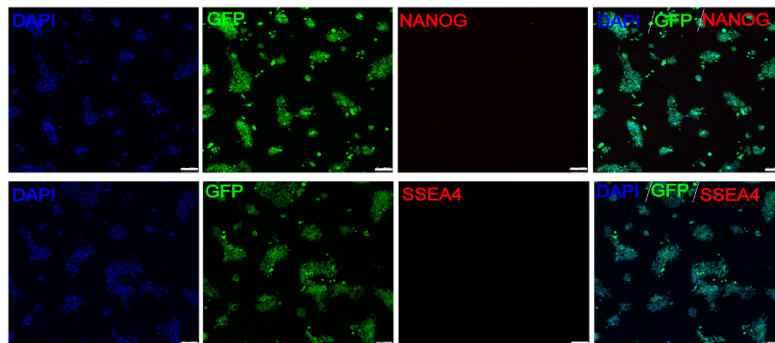

**Figure S1. Knock-in of GFP gene at AAVS1 locus.**

(A) Schematic diagram of site-specific knock-in of GFP gene at AAVS1 locus and DNA sequencing results using F1/R1, F2/R2 and F3/R3 primers. (B) Validation of knock-in of GFP using three pairs of primers on the cells of iNSCs-GFP, iNSCs, and 293T. (C) GFP expression in iNSCs cultured in proliferation (C1) and differentiation (C2) medium, respectively. Scale bars, 100  $\mu$ m. (D) iNSCs-GFP stained negative for pluripotent markers SSEA4 and NANOG. Scale bars, 100  $\mu$ m.

(a)

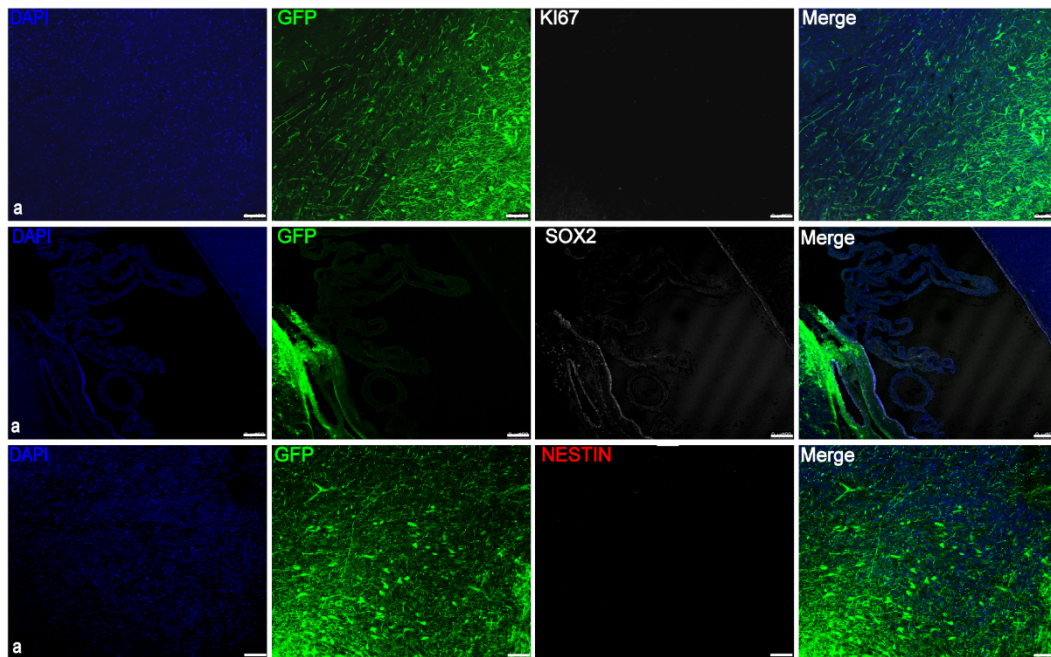

(b)

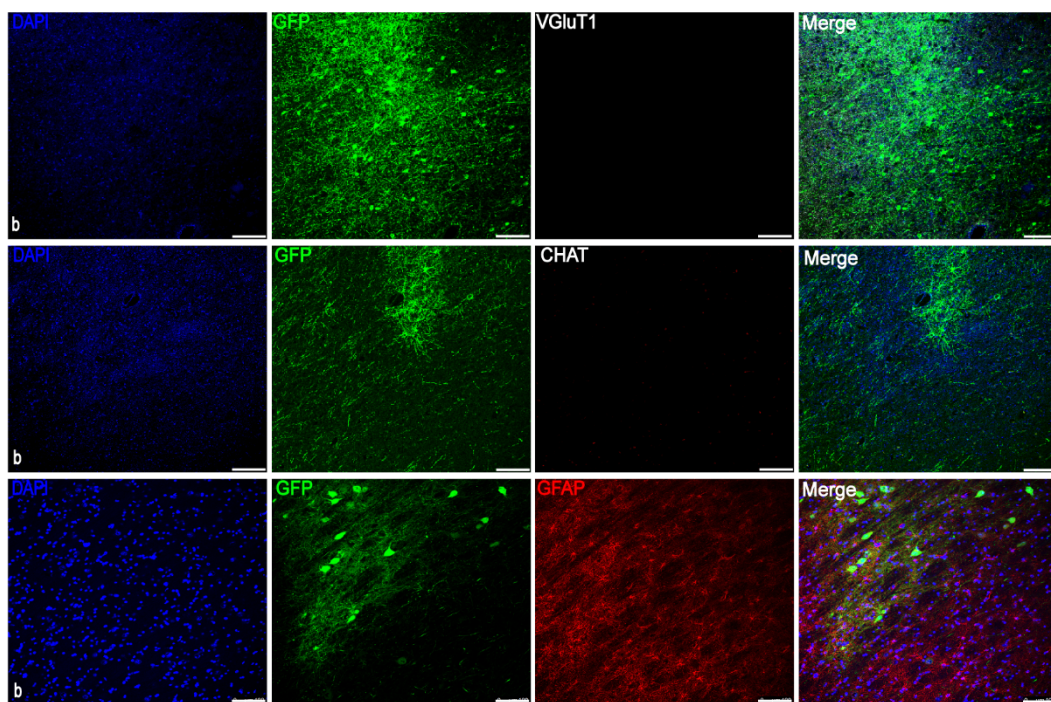

**Figure S2. Safety and specific differentiation of iNSCs transplanted at motor cortex and of iNSC-DAPs engrafted at striatum in the brain of a nonhuman primate.**

(A) iNSCs transplanted at the motor cortex were negative for KI67, SOX2, or NESTIN three months following engraftment. Scale bars, 100  $\mu$ m. (B) iNSC-DAPs transplanted

at the striatum stained negative for glutaminergic neuron marker, VGluT1, cholinergic neuron marker, CHAT, and astrocyte marker, GFAP three months following engraftment. Scale bars, 100  $\mu$ m.

**Table S1. Primers and product length of PCR for each gene.**

| Gene           | Forward (5'-3')        | Reverse (5'-3')         | Product length (bp) |
|----------------|------------------------|-------------------------|---------------------|
| SOX2           | AGTCTCCAAGCGACGAAAAA   | TTTCACGTTTGCAACTGTCC    | 189                 |
| FABP7          | TGTGACCAAACCAACGGTAAT  | CTTTGCCATCCCATTCTGTA    | 200                 |
| HES5           | GCGACCGCATCAACAGCA     | GCGTGGAGCGTCAGGAACT     | 235                 |
| PAX6           | GGTGAGAAGTGTGGGAACCG   | GTGCTGCTGTTGTTGCTTGA    | 183                 |
| SOX1           | GTTTTTTGTAGTTGTTACCGC  | GCATTTACAAGAAATAATAC    | 173                 |
| FOXA2          | GGAGCAGCTACTATGCAGAGC  | CGTGTTTCATGCCGTTTCATCC  | 83                  |
| LMX1A          | ACGTCCGAGAACCATCTTGAC  | CACCACCGTTTGTCTGAGC     | 248                 |
| TH             | GGGCTGTGTAAGCAGAACG    | AAGGCCCGAATCTCAGGCT     | 107                 |
| NURR1          | ACCACTCTTCGGGAGAATACA  | GGCATTGTTGTTACAAGCAAGGT | 175                 |
| $\beta$ -Actin | CTTAGTTGCGTTACACCCTTTC | ACCTTCACCGTTCCAGTTTT    | 145                 |
| F1/R2          | GCAGTCCTCCTTACCATCC    | CCAGAATAGAATGACACCTAC   | 2022                |
| F2/R2          | TCAATCCAGCGGACCTTC     | CAGAGACAGTGACCAACCA     | 2636                |
| F3/R3          | GCAGCACGACTTCTTCAA     | GAACTCCAGCAGGACCAT      | 433                 |

**Table S2. Antibody information.**

| Primary antibody | Dilution | Vendor      | Host   |
|------------------|----------|-------------|--------|
| TH               | 1:500    | Abcam       | Rabbit |
| NURR1            | 1:500    | Abcam       | Rabbit |
| GIRK2            | 1:500    | Abcam       | Goat   |
| CHAT             | 1:500    | Millipore   | Goat   |
| FOXA2            | 1:500    | Abcam       | Rabbit |
| MNX1             | 1:500    | Abcam       | Rabbit |
| KI67             | 1:500    | Proteintech | Rabbit |
| GFAP             | 1:500    | Biologend   | Mouse  |
| SOX2             | 1:500    | Abcam       | Mouse  |
| ZO-1             | 1:500    | Abcam       | Rabbit |
| NESTIN           | 1:500    | Abcam       | Mouse  |
| PAX6             | 1:500    | Abcam       | Rabbit |
| OLIG2            | 1:500    | Abcam       | Rabbit |
| N-CADHERIN       | 1:500    | Abcam       | Rabbit |
| NANOG            | 1:500    | R&D System  | Goat   |
| SSEA4            | 1:500    | Abcam       | Mouse  |
| VGlut1           | 1:500    | Abcam       | Rabbit |
